# Supplementary material
Source: MDPI journal article supplement (https://www.mdpi.com/2072-4292/16/4/707)
Supplement: s1 [file s1 › remotesensing-2797392-supplementary.pdf]

## Supplementary Materials

**Table S1.** Changes in the islet area from 1988 to 2020.

| Year | Total water surface (km <sup>2</sup> ) |        |        | Islet area (km <sup>2</sup> ) |        |        | Islets area/ total water surface (%) |        |        |
|------|----------------------------------------|--------|--------|-------------------------------|--------|--------|--------------------------------------|--------|--------|
|      | VMD                                    | Mekong | Bassac | VMD                           | Mekong | Bassac | VMD                                  | Mekong | Bassac |
| 1988 | 1,323.0                                | 916.2  | 406.8  | 440.6                         | 339.0  | 101.6  | 33.3                                 | 37.0   | 25.0   |
| 1995 | 1,319.9                                | 910.9  | 409.0  | 437.4                         | 336.6  | 100.8  | 33.1                                 | 37.0   | 24.6   |
| 2002 | 1,312.1                                | 906.3  | 405.8  | 446.2                         | 343.3  | 102.9  | 34.0                                 | 37.9   | 25.4   |
| 2008 | 1,307.0                                | 902.9  | 404.1  | 447.9                         | 344.4  | 103.5  | 34.3                                 | 38.1   | 25.6   |
| 2015 | 1,306.6                                | 903.7  | 402.9  | 449.8                         | 344.4  | 105.4  | 34.4                                 | 38.1   | 26.2   |
| 2020 | 1,313.2                                | 906.2  | 407.1  | 453.9                         | 346.5  | 107.5  | 34.6                                 | 38.2   | 26.4   |

**Table S2.** Changes in sinuosity index of the Mekong and Bassac Rivers during 1988–2020.

| Branch | 1988 | 1995 | 2002 | 2008 | 2015 | 2020 |
|--------|------|------|------|------|------|------|
| Mekong | 1.15 | 1.16 | 1.16 | 1.17 | 1.16 | 1.17 |
| Bassac | 1.22 | 1.21 | 1.21 | 1.21 | 1.21 | 1.23 |

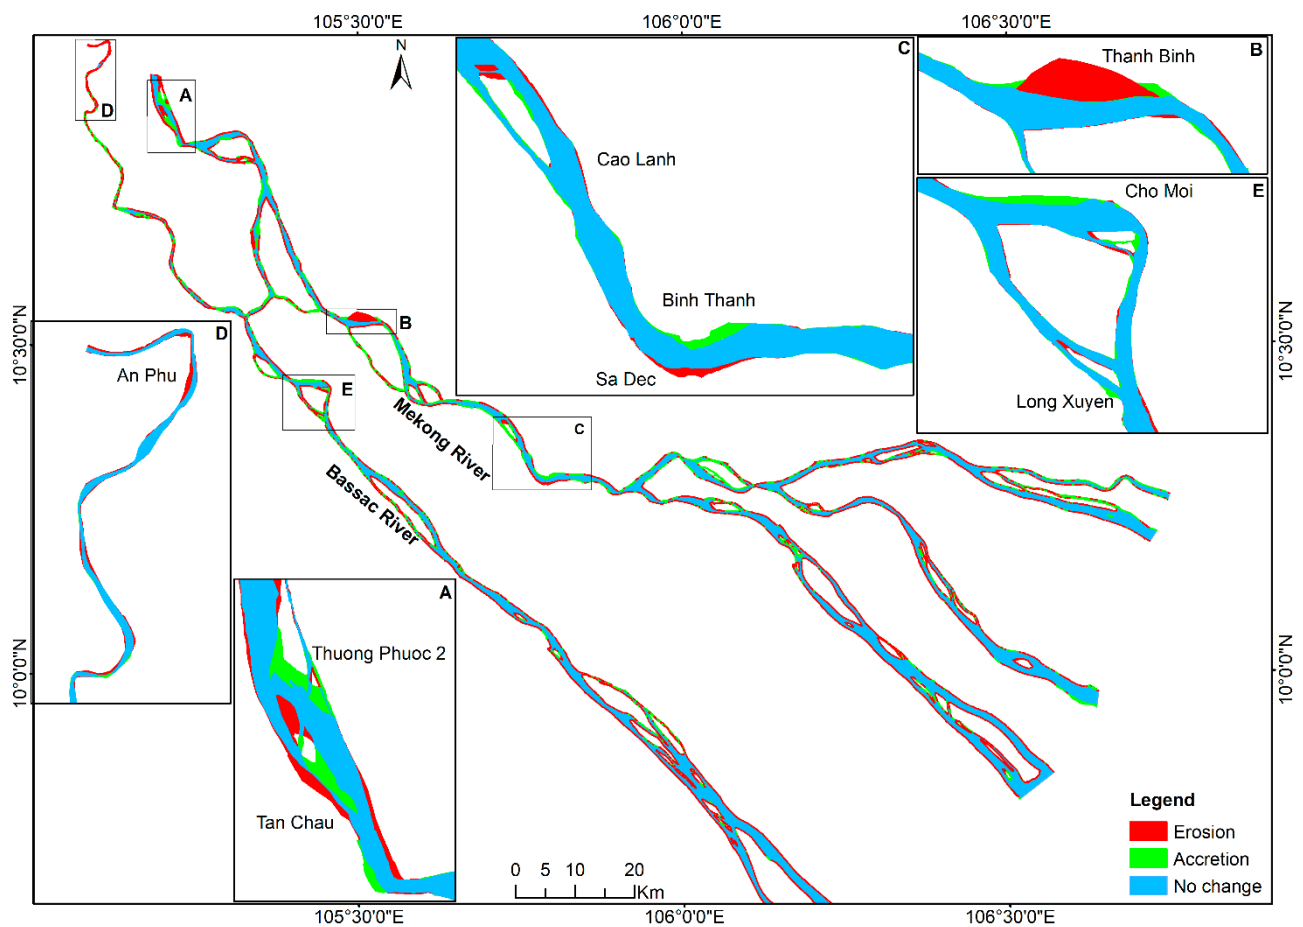

**Figure S1.** Erosion and accretion map of riverbank and islets in 1988–1995.

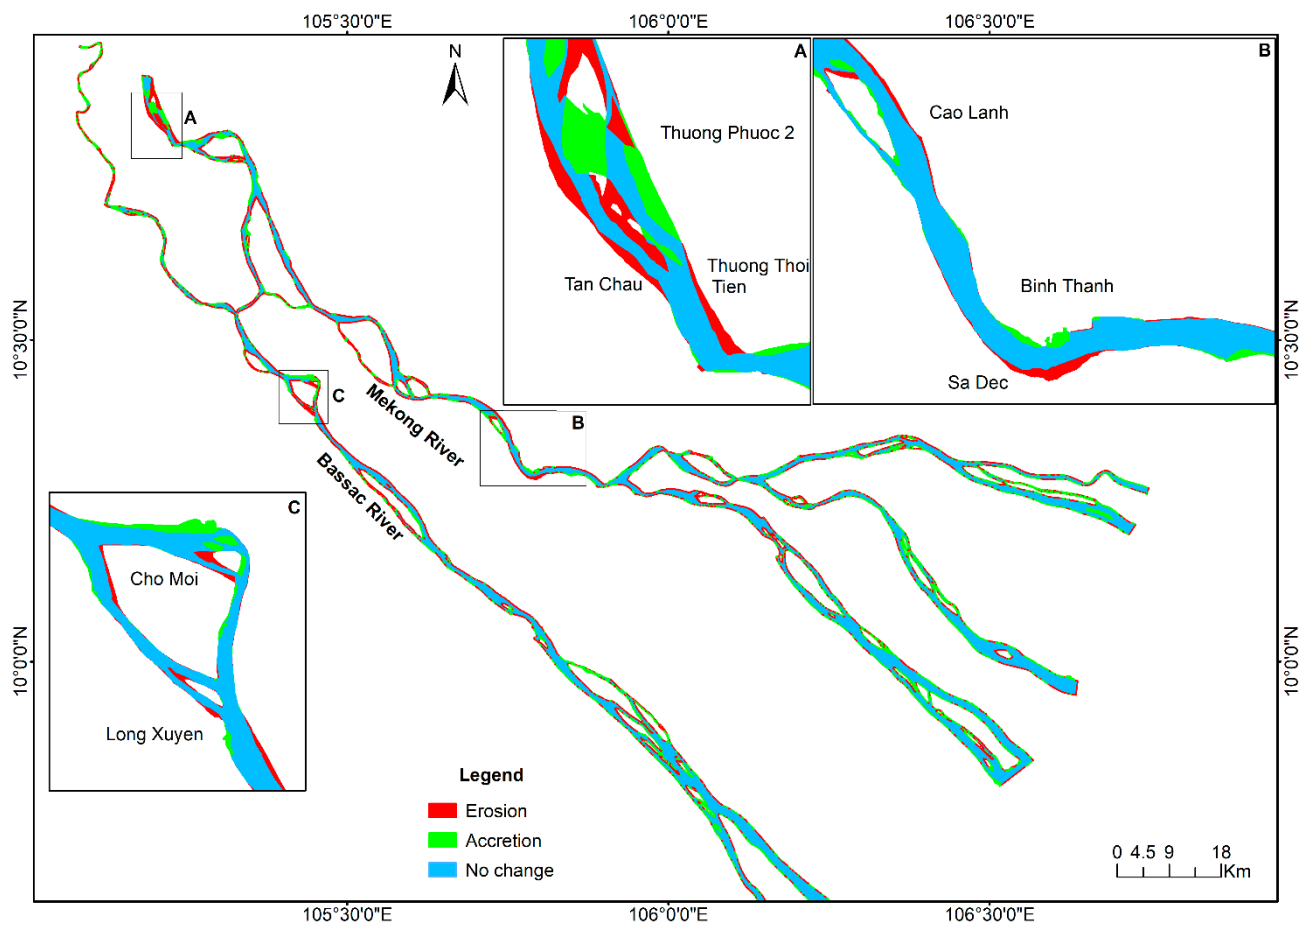

Figure S2. Erosion and accretion map of riverbank and islets in 1995–2002.

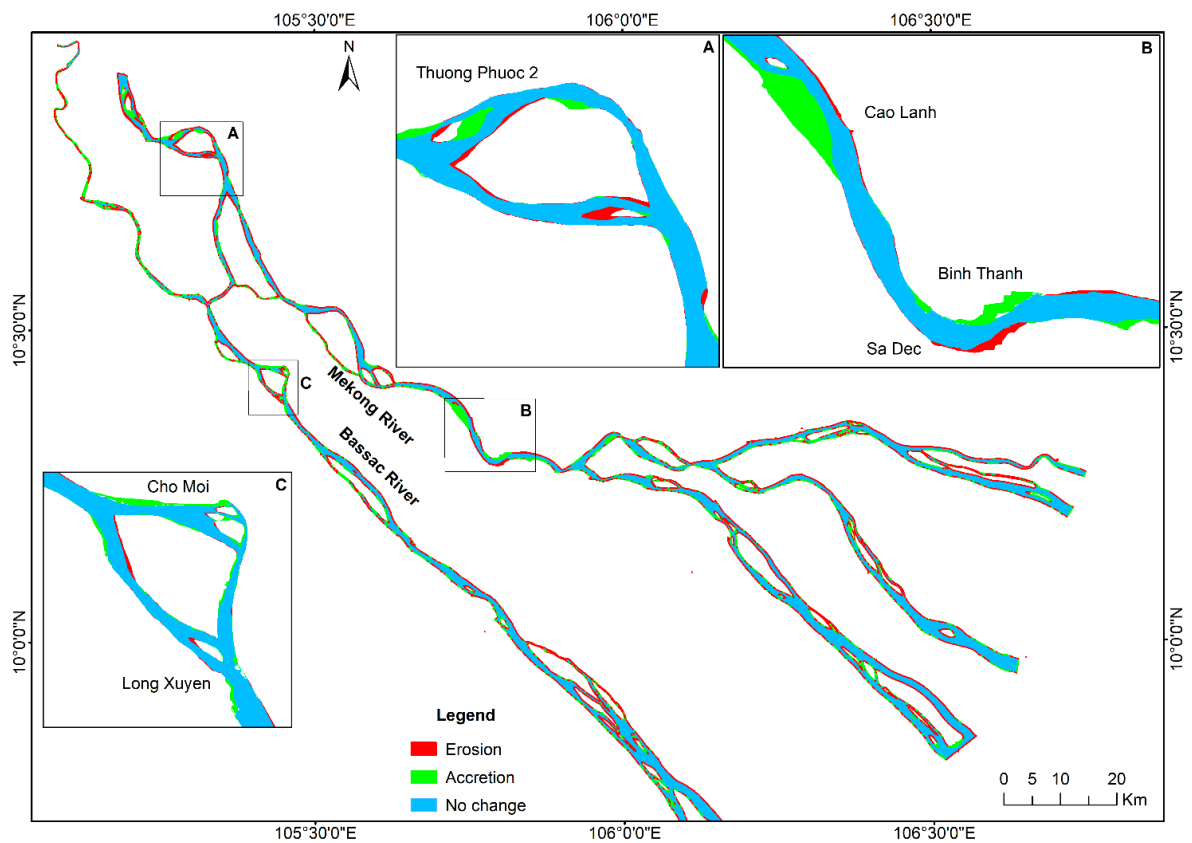

Figure S3. Erosion and accretion map of riverbank and islets in 2002–2008.

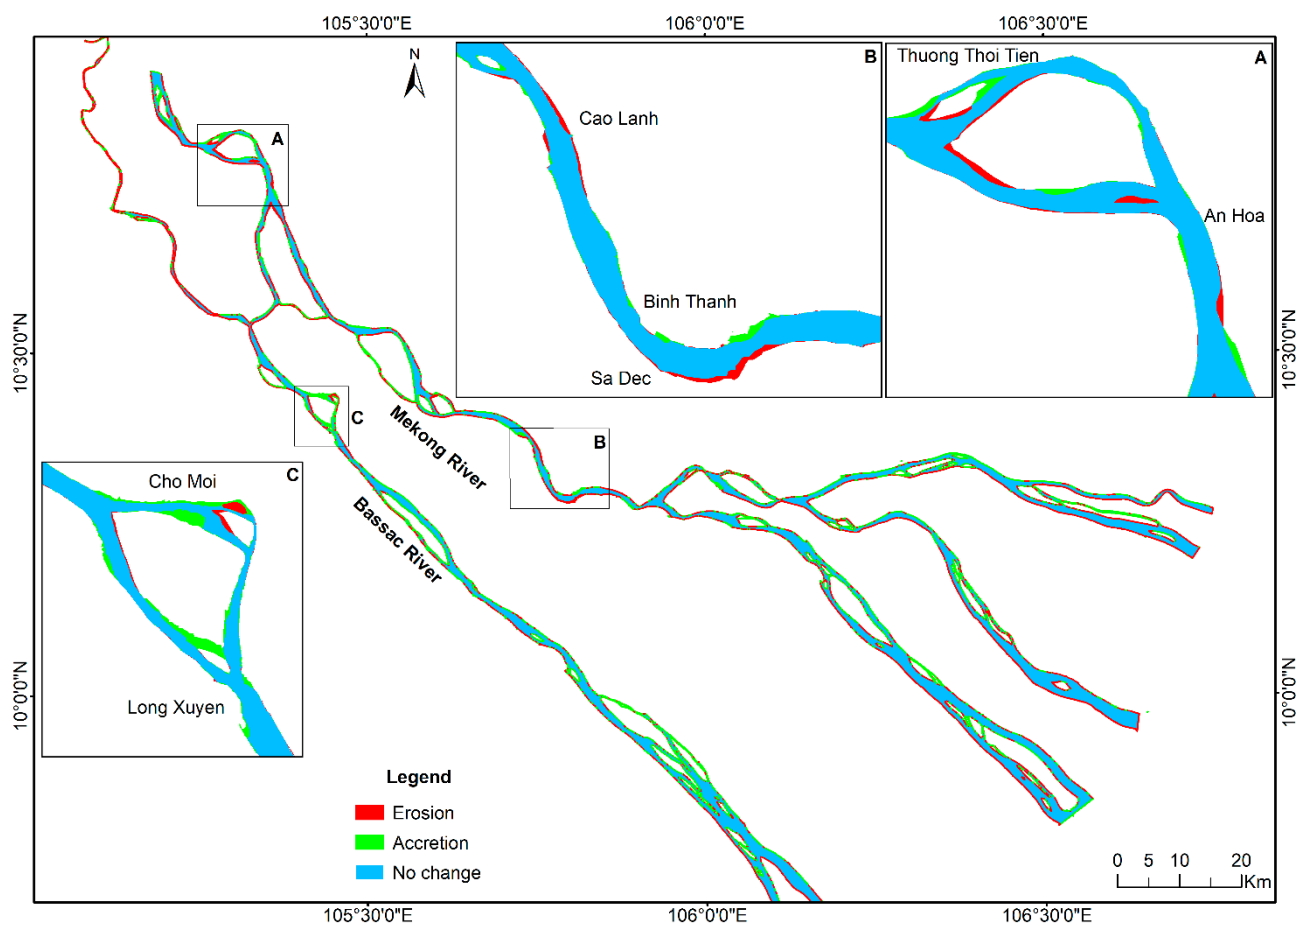

**Figure S4.** Erosion and accretion map of riverbank and islets in 2008–2015.

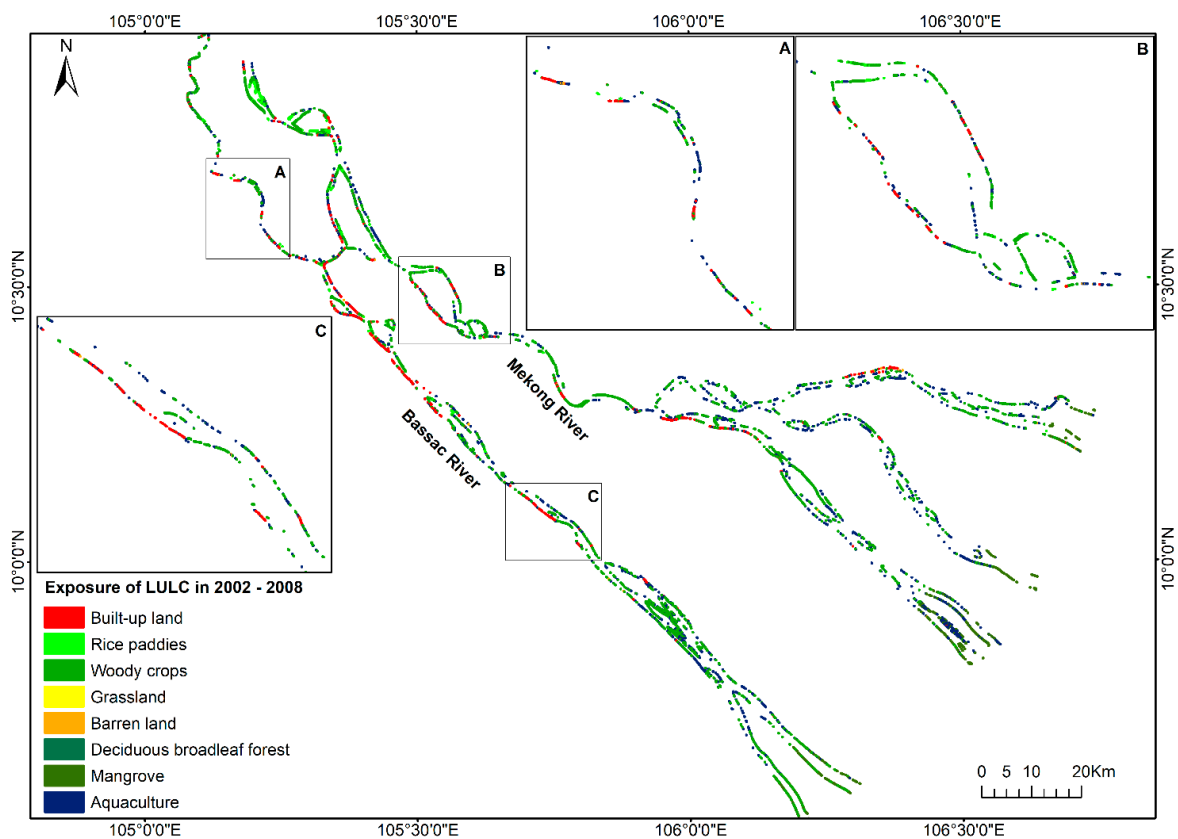

**Figure S5.** Exposure of LULC to riverbank and islet erosion in the VMD in 2002–2008.

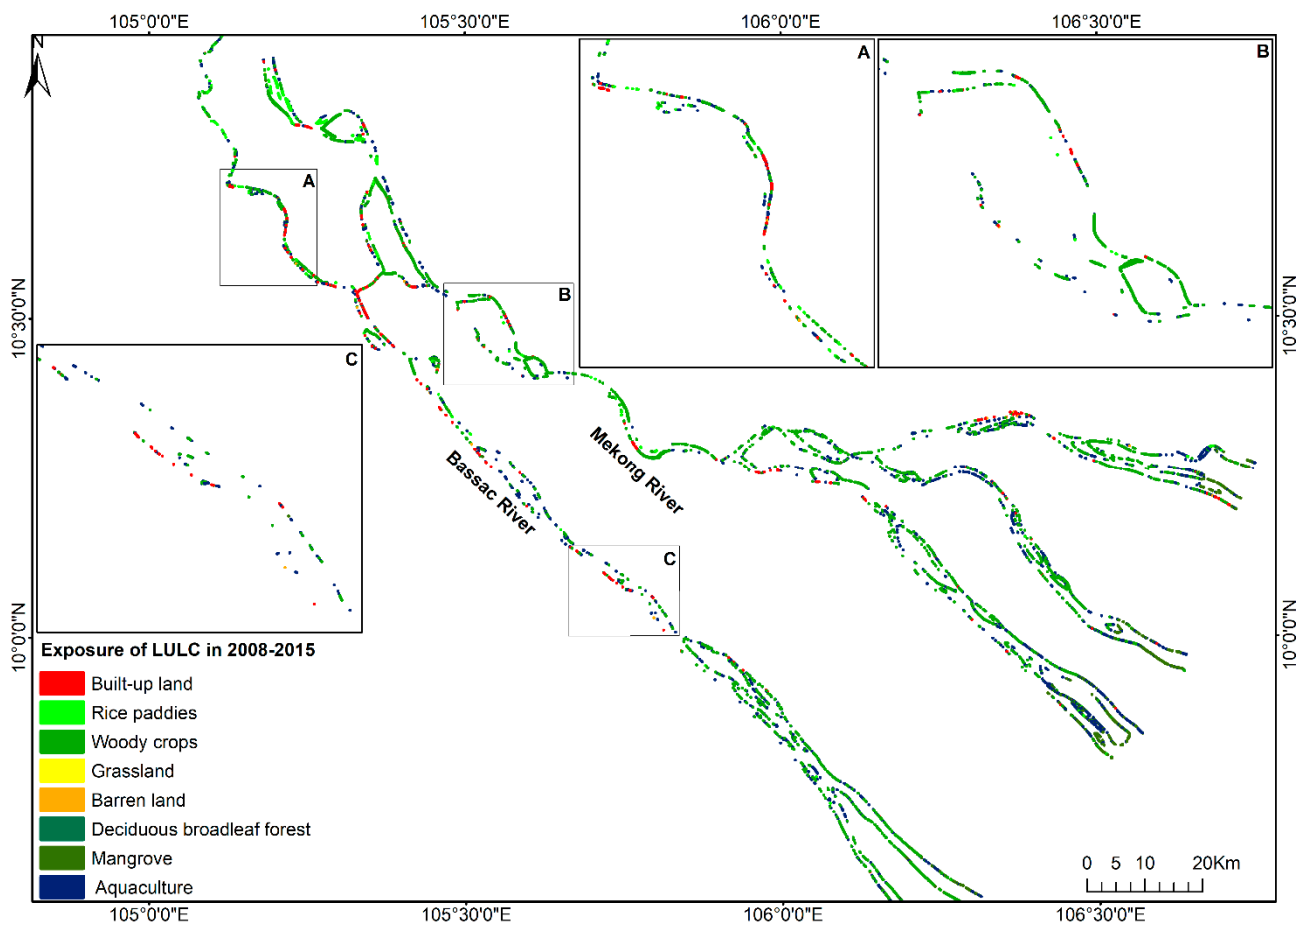

**Figure S6.** Exposure of LULC to riverbank and islet erosion in the VMD in 2008-2015.

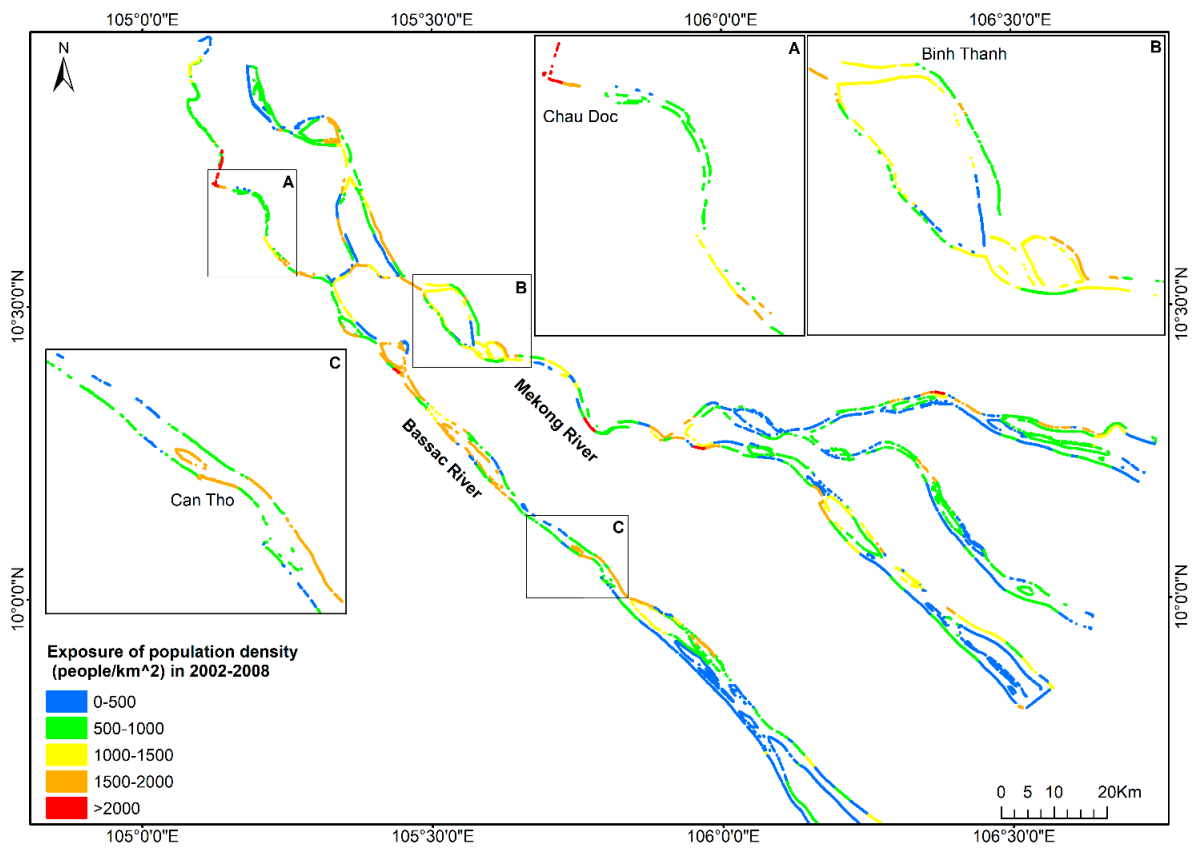

**Figure S7.** Exposure of population density to riverbank and islet erosion in the VMD in 2002-2008.

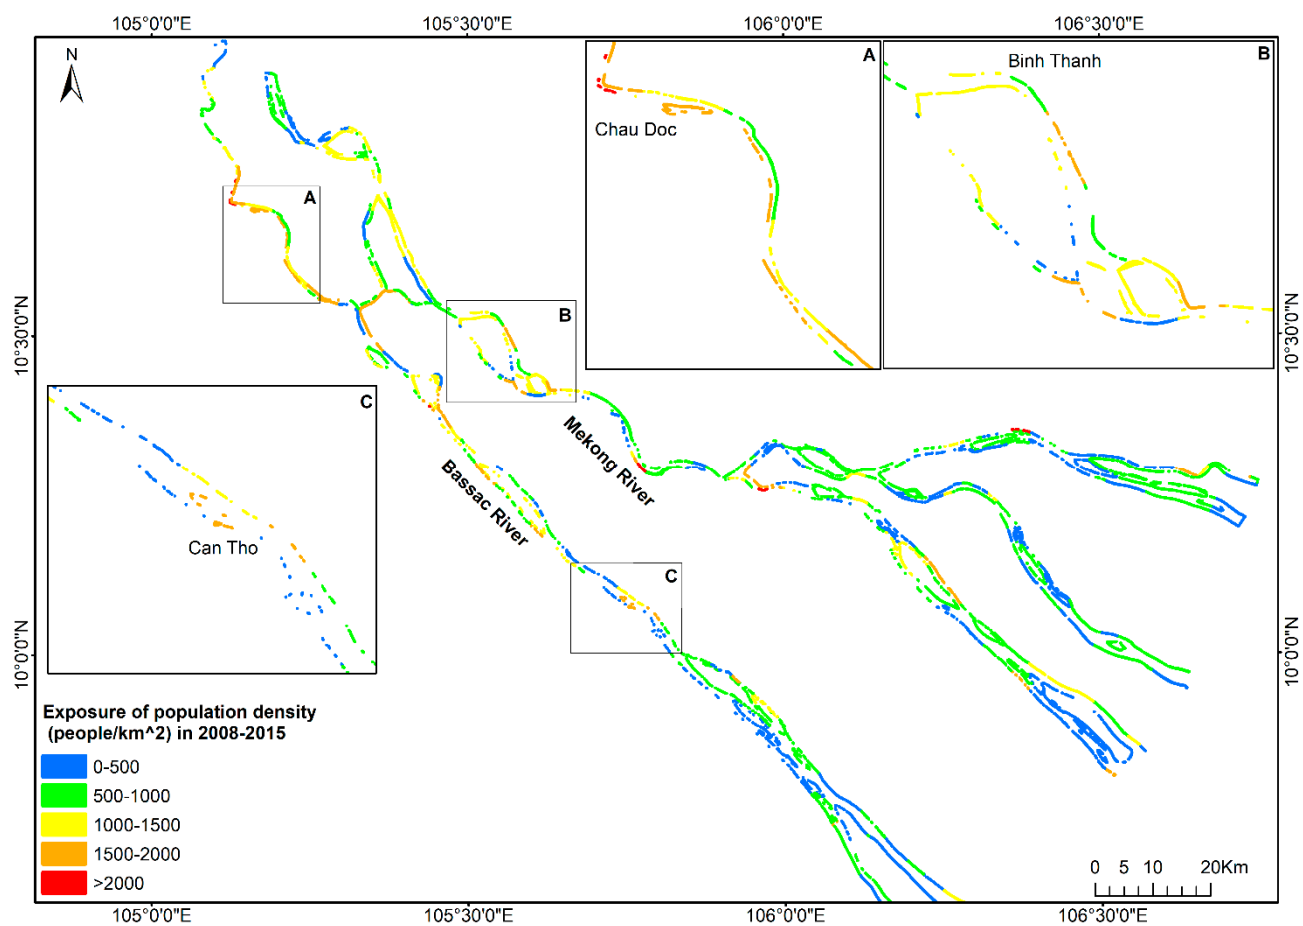

**Figure S8.** Exposure of population density to riverbank and islet erosion in the VMD in 2008–2015.

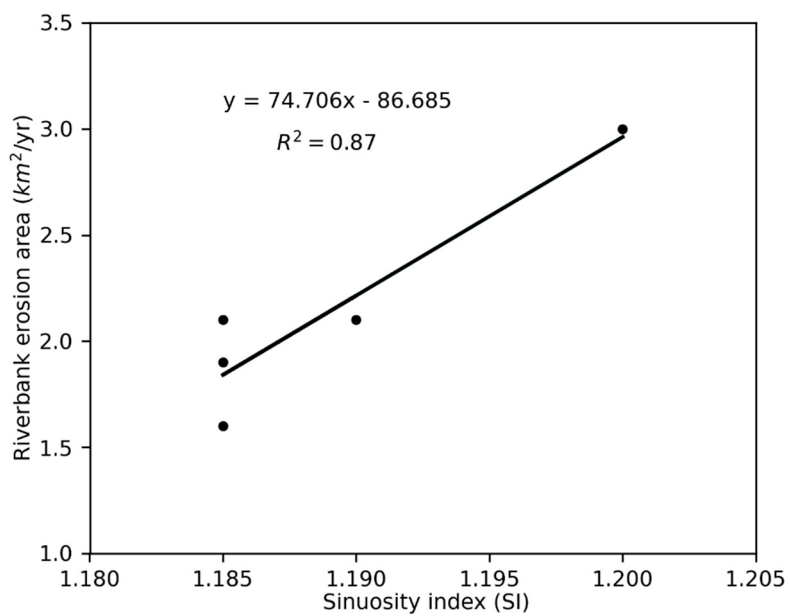

**Figure S9.** A linear regression between SI and the riverbank erosion area of the VMD.

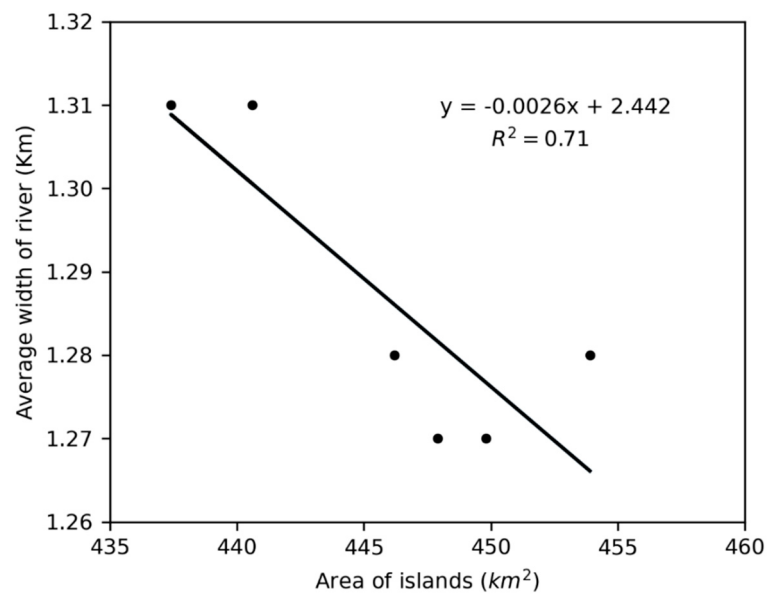

**Figure S10.** A linear regression between islet area and the average width of the VMD.
